# Supplementary material for: Xanthine Derivatives Reveal an Allosteric Binding Site in Methylenetetrahydrofolate Dehydrogenase 2 (MTHFD2)
Source: PubMed Central journal article supplement (PMC8389891; doi:10.1021/acs.jmedchem.1c00663), 2021-08-02
Supplement: jm1c00663_si_001.pdf [file jm1c00663_si_001.pdf]

## Supporting Information

# Xanthine Derivatives Reveal an Allosteric Binding Site in Methylene tetrahydrofolate Dehydrogenase 2 (MTHFD2)

*Lung-Chun Lee,<sup>†</sup> Yi-Hui Peng,<sup>†#</sup> Hsin-Huei Chang,<sup>†#</sup> Tsu-Hsu,<sup>†#</sup> Cheng-Tai Lu,<sup>†</sup> Chih-Hsiang Huang,<sup>†</sup> Ching-Cheng Hsueh,<sup>†</sup> Fang-Chun Kung,<sup>†</sup> Ching-Chuan Kuo,<sup>†§\*</sup> Weir-Torn Jiaang,<sup>†\*</sup> and Su-Ying Wu<sup>†\*</sup>*

<sup>†</sup> Institute of Biotechnology and Pharmaceutical Research, National Health Research Institutes, 35, Keyan Road, Zhunan Town, Miaoli County 350, Taiwan, R.O.C.

<sup>§</sup> Graduate Institute of Biomedical Sciences, China Medical University, Taichung 406, Taiwan, R.O.C.

<sup>#</sup> Yi-Hui Peng, Hsin-Huei Chang and Tsu-Hsu contributed equally

Corresponding author:

*Su-Ying Wu*, Email: [suying@nhri.org.tw](mailto:suying@nhri.org.tw)

*Weir-Torn Jiaang*, Email: [wtjiaang@nhri.org.tw](mailto:wtjiaang@nhri.org.tw)

*Ching-Chuan Kuo*, Email: [cckuo@nhri.org.tw](mailto:cckuo@nhri.org.tw)

**Table of Contents**

**Crystallization of MTHFD2/NAD<sup>+</sup>/P<sub>i</sub>/21 ..... S3**  
**Figure S-1. Chemical structure of compound 21 ..... S3**  
**Figure S-2. HPLC trace and <sup>1</sup>H NMR spectrum of 15..... S4**  
**Reference ..... S5**

### Crystallization of MTHFD2/NAD<sup>+</sup>/P<sub>i</sub>/21

Co-crystals of human MTHFD2, NAD<sup>+</sup>, phosphate and a weak inhibitor, (4-(3-(4-amino-6-hydroxypyrimidin-5-yl)ureido)benzoyl)-L-glutamic acid (**21**, IC<sub>50</sub> = 8.33 μM in the MTHFD2 enzymatic assay) were prepared by hanging-drop vapor diffusion method. **21** can be prepared according to previously described methods.<sup>1</sup> 2 mM **21**, 5 mM NAD<sup>+</sup> and 6 mM MgCl<sub>2</sub> were added to purified human MTHFD2 protein and incubated on ice for 40 min. Na<sub>2</sub>HPO<sub>4</sub> was added to a final concentration of 10 mM and equilibrated for 10 min. The mixture of protein and **21** was 1:1 (v/v) mixed with reservoir solution (12% isopropanol, 0.1 M bis-Tris, pH 6.5, 3% PEG200) and incubated at 18 °C. After 1 week, the crystals were flash-frozen in liquid nitrogen with DMSO added to the drop as a freeze protectant and subjected for data collection.

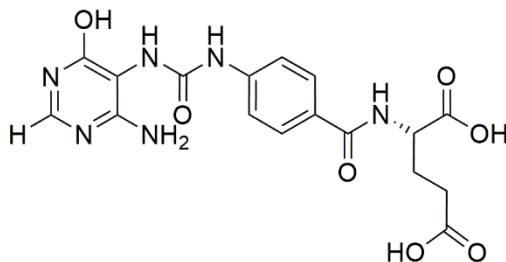

**21**

**Figure S-1.** Chemical structure of **21**.

compound 15

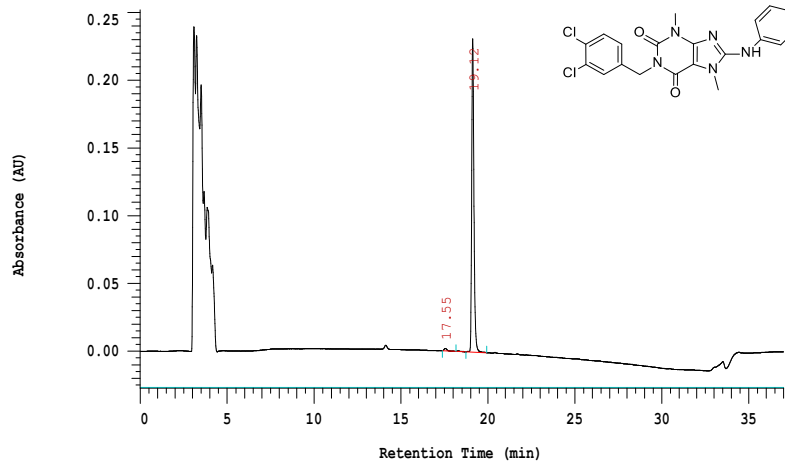

Peak Quantitation: AREA  
Calculation Method: AREA%

| No. | RT    | Area    | Height | Conc 1  |
|-----|-------|---------|--------|---------|
| 1   | 17.55 | 9560    | 943    | 0.941   |
| 2   | 19.12 | 1005861 | 115465 | 99.059  |
|     |       | 1015421 | 116408 | 100.000 |

compound 15

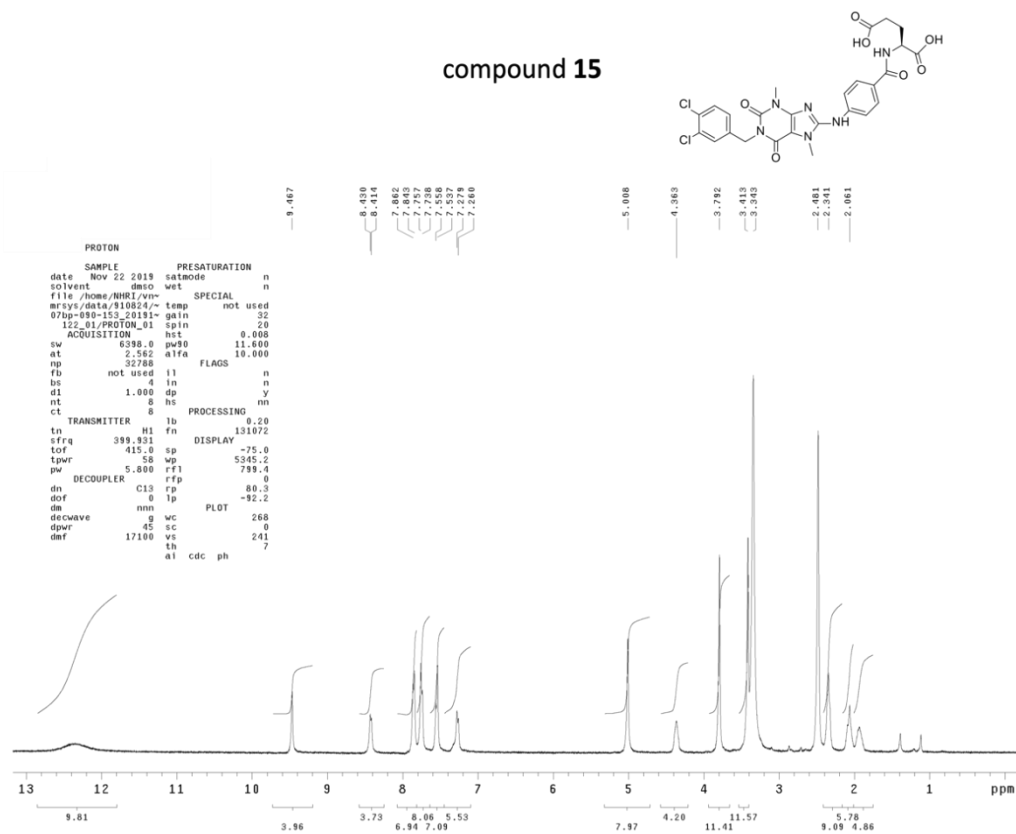

Figure S-2. HPLC trace and <sup>1</sup>H NMR spectrum of 15.

## Reference

1. Eadsforth, T. C.; Pinto, A.; Luciani, R.; Tamborini, L.; Cullia, G.; De Micheli, C.; Marinelli, L.; Cosconati, S.; Novellino, E.; Presti, L. L.; Cordeiro da Silva, A.; Conti, P.; Hunter, W. N.; Costi, M. P. Characterization of 2,4-diamino-6-oxo-1,6-dihydropyrimidin-5-yl ureido based inhibitors of trypanosoma brucei FOLD and testing for antiparasitic activity. *J. Med. Chem.* **2015**, *58*, 7938–7948.
